# Supplementary material for: Effect of temperature, CO2 and O2 on motility and mobility of Anisakidae larvae
Source: PubMed Central journal article supplement (PMC7895964; doi:10.1038/s41598-021-83505-5), 2021-02-19
Supplement: 41598_2021_83505_MOESM2_ESM.pdf [file 41598_2021_83505_MOESM2_ESM.pdf]

# Effect of temperature, CO<sub>2</sub> and O<sub>2</sub> on motility and mobility of *Anisakidae* larvae

Aiyan Guan<sup>1,2,\*</sup>, Inge Van Damme<sup>2</sup>, Frank Devlieghere<sup>1,\*</sup> and Sarah Gabriël<sup>2,\*</sup>

## Supplementary Figure 2

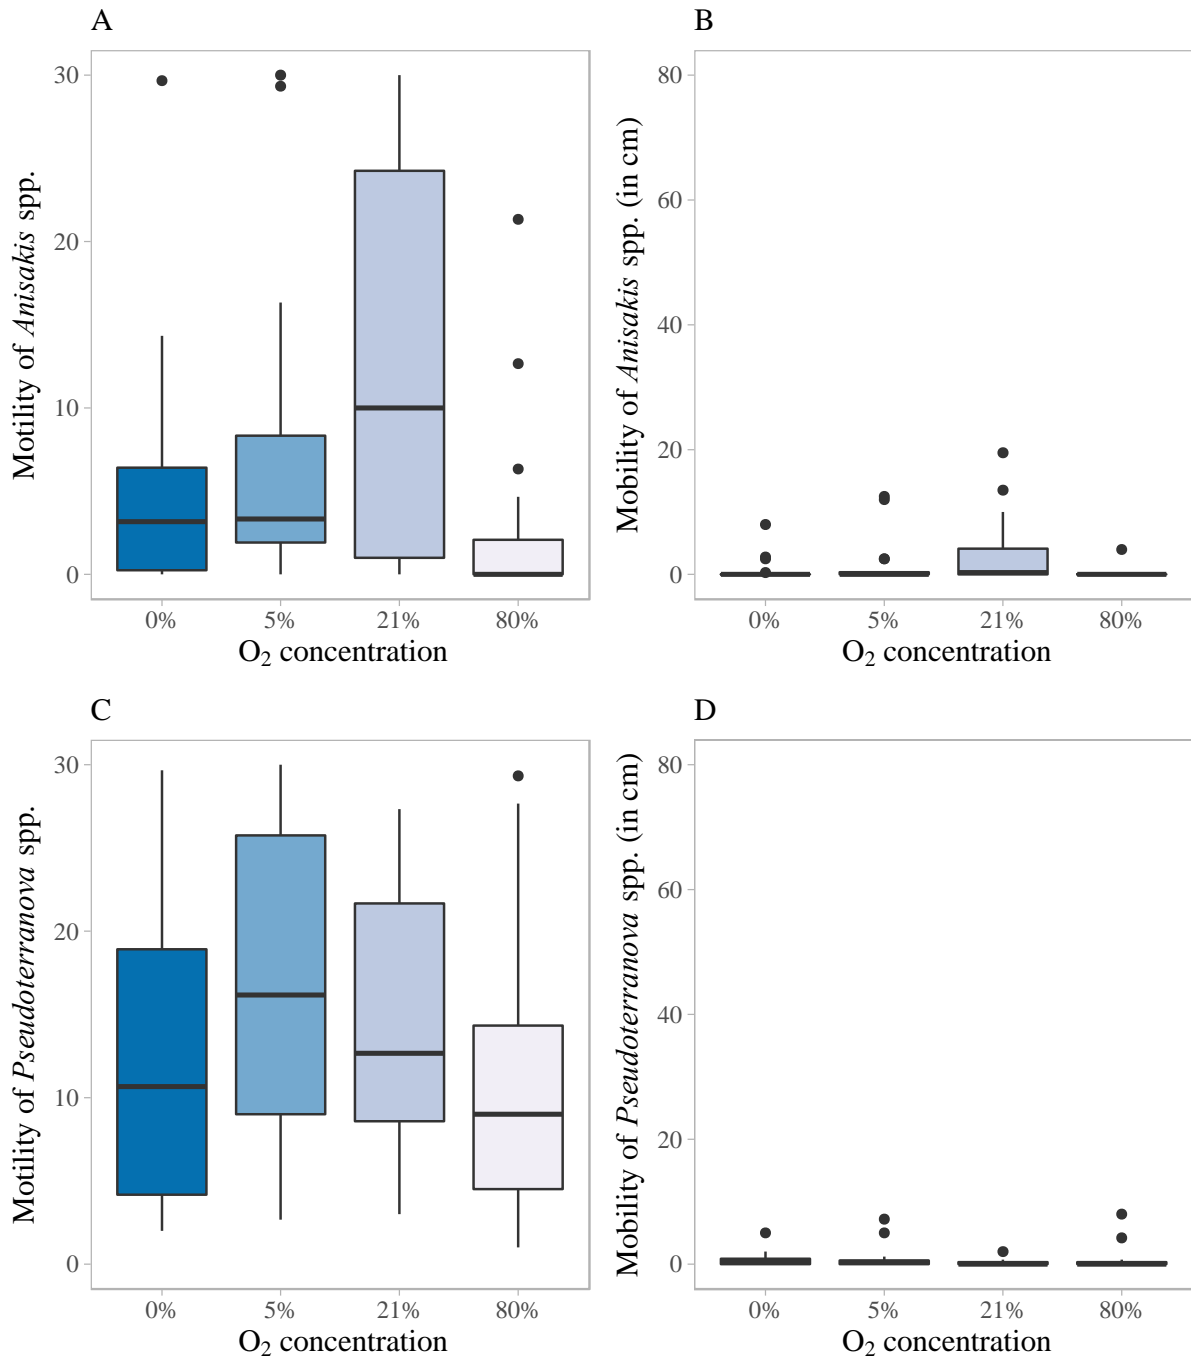

**Supplementary Figure 2. Effect of O<sub>2</sub> on larval motility and mobility at 6 °C during the first 30 minutes. A:**

motility of *Anisakis* spp., B: mobility of *Anisakis* spp., C: motility of *Pseudoterranova* spp. and D: mobility of *Pseudoterranova* spp. under different O<sub>2</sub> conditions. The box consists of the upper quartile, median and lower quartile. The whiskers are drawn up to the highest or lowest observed point from the dataset that falls within 1.5 times the interquartile range. Observations beyond the end of the whiskers are plotted individually.
